# Supplementary material
Source: Springer Nature journal article supplement (https://www.springermedizin.de/resource/supplementary/12893_2012_563_MOESM1_ESM.pdf/9512654)

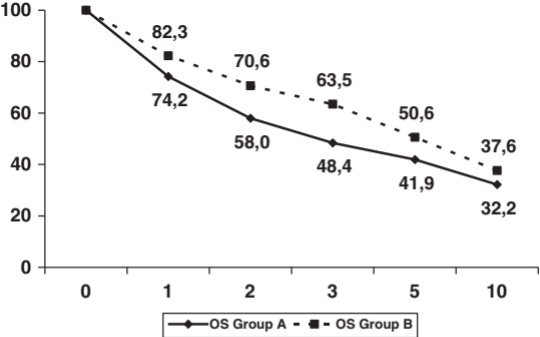

| Years | 0       | 1         | 2          | 3          | 5          | 10         |
|-------|---------|-----------|------------|------------|------------|------------|
| A     | 100%=31 | 74,2%=23  | 58%=18     | 48,4%=15   | 41,9%=13   | 32,25%=10  |
| B     | 100%=85 | 82,35%=75 | 70,588%=60 | 63,529%=54 | 50,588%=43 | 37,647%=32 |

Supplement: MOESM1 [file 9512654]
